# Supplementary material for: Behavioral Voluntary and Social Bioassays Enabling Identification of Complex and Sex-Dependent Pain-(-Related) Phenotypes in Rats with Bone Cancer
Source: MDPI journal article supplement (doi:10.3390/cancers15051565), 2023-03-02
Supplement: s1 [file s1]

**Table S1. Cluster analysis of PCA results (Figure 2) by multivariate analysis of variance (MANOVA).**

| Time | Model      | ♀/♂ | Sig      | Wilks-Lambda |
|------|------------|-----|----------|--------------|
| Pre  | Naive/Sham | ♀   | 0.867    | 0.969        |
| Pre  | Naive/CIBP | ♀   | 0.567    | 0.902        |
| Pre  | Sham/CIBP  | ♀   | 0.356    | 0.853        |
| 3d   | Naive/Sham | ♀   | 0.340    | 0.787        |
| 3d   | Naive/CIBP | ♀   | 0.776    | 0.955        |
| 3d   | Sham/CIBP  | ♀   | 0.41     | 0.872        |
| 6d   | Naive/Sham | ♀   | 0.479    | 0.849        |
| 6d   | Naive/CIBP | ♀   | 0.142    | 0.457        |
| 6d   | Sham/CIBP  | ♀   | 0.211    | 0.553        |
| 8d   | Naive/Sham | ♀   | 0.616    | 0.898        |
| 8d   | Naive/CIBP | ♀   | <.001*** | 0.045        |
| 8d   | Sham/CIBP  | ♀   | <.001*** | 0.064        |
| 14d  | Naive/Sham | ♀   | 0.777    | 0.946        |
| 14d  | Naive/CIBP | ♀   | <.001*** | 0.069        |
| 14d  | Sham/CIBP  | ♀   | <.001*** | 0.143        |
| 17d  | Naive/Sham | ♀   | 0.413    | 0.822        |
| 17d  | Naive/CIBP | ♀   | <.001*** | 0.055        |
| 17d  | Sham/CIBP  | ♀   | <.001*** | 0.040        |
|      |            |     |          |              |
| Pre  | Naive/Sham | ♂   | 0.631    | 0.998        |
| Pre  | Naive/CIBP | ♂   | 0.981    | 0.997        |
| Pre  | Sham/CIBP  | ♂   | 0.857    | 0.980        |
| 3d   | Naive/Sham | ♂   | 0.905    | 0.982        |
| 3d   | Naive/CIBP | ♂   | 0.178    | 0.750        |
| 3d   | Sham/CIBP  | ♂   | 0.180    | 0.807        |
| 6d   | Naive/Sham | ♂   | 0.223    | 0.761        |
| 6d   | Naive/CIBP | ♂   | <.001*** | 0.192        |
| 6d   | Sham/CIBP  | ♂   | <.001*** | 0.213        |
| 8d   | Naive/Sham | ♂   | 0.426    | 0.766        |
| 8d   | Naive/CIBP | ♂   | 0.031*   | 0.630        |
| 8d   | Sham/CIBP  | ♂   | <.001*** | 0.191        |
| 14d  | Naive/Sham | ♂   | 0.619    | 0.917        |
| 14d  | Naive/CIBP | ♂   | <.001*** | 0.181        |
| 14d  | Sham/CIBP  | ♂   | <.001*** | 0.237        |
| 17d  | Naive/Sham | ♂   | 0.277    | 0.792        |
| 17d  | Naive/CIBP | ♂   | <.001*** | 0.109        |
| 17d  | Sham/CIBP  | ♂   | <.001*** | 0.123        |

**Table S2. Ethogram of rat behavior in the homecage system.**

The observation time includes the two first night hours (6 pm to 8 pm) before (baseline) and days 3, 8, 14, and 17 after walker 256 cell inoculation.

| Category             | Behavior             | Description                                      |
|----------------------|----------------------|--------------------------------------------------|
| Pain Behaviors       | Ipsilateral Grooming | Grooming of ipsilateral hindleg                  |
| Grooming behavior    | Self Grooming        | Grooming, sniffing, licking body                 |
| Ambulatory Behaviors | Bipedal Stance       | Bipedal stance, fully erect posture              |
|                      | Jumping              | Jump to the 1st floor                            |
| Resting Behaviors    | Individual Resting   | Rest without body contact with the cagemate      |
|                      | Social Resting       | Rest with body contact with the cagemate         |
|                      | Total Resting        | Total rest without consideration of the cagemate |
| Social Behavior      | Playing              | Soliciting, chasing, boxing, pinning             |
|                      | Allo Grooming        | Grooming, sniffing, licking body of cagemate     |
|                      | Approximation        | Approximation, Head length, purposeful           |

**Table S3. Cohen's  $\kappa$  values of home cage observation analysis.**

| Behavior              | Cohen's $\kappa$ |
|-----------------------|------------------|
| Individual Resting    | 0.929            |
| Social Resting        | 0.965            |
| Bipedal Stance        | 0.943            |
| Jump to the 1st floor | 0.957            |
| Food Ingestion        | 0.874            |
| Self Grooming         | 0.967            |
| Playing               | 0.784            |
| Allo Grooming         | 0.898            |
| Ipsilateral Grooming  | 0.841            |
| Food Ingestion        | 0.874            |
| Approximation         | 0.974            |

**Table S4. Cluster analysis of PCA results (Figure S4) by multivariate analysis of variance (MANOVA); p-values: \*<0.05, \*\*<0.01, \*\*\*<0.001.**

| Time       | Model                                              | ♀/♂ | Sig            | Wilks/Lambda |
|------------|----------------------------------------------------|-----|----------------|--------------|
| Pre        | Naive-Naive/Sham-Sham                              | ♀   | 0.975          | 0.850        |
| Pre        | Naive-Naive/CIBP-CIBP                              | ♀   | 0.874          | 0.217        |
| Pre        | Naive-Naive/CIBP-Sham <sub>BY</sub>                | ♀   | 0.92           | 0.686        |
| Pre        | Naive-Naive/Sham <sub>BY</sub> -CIBP               | ♀   | 0.741          | 0.26         |
| Pre        | Sham-Sham/CIBP-CIBP                                | ♀   | 0.078          | 0.362        |
| Pre        | Sham-Sham/ CIBP-Sham <sub>BY</sub>                 | ♀   | 0.382          | 0.807        |
| Pre        | Sham-Sham/ Sham <sub>BY</sub> -CIBP                | ♀   | 0.053          | 0.521        |
| Pre        | CIBP-CIBP/ CIBP-Sham <sub>BY</sub>                 | ♀   | 0.392          | 0.812        |
| Pre        | CIBP-CIBP/ Sham <sub>BY</sub> -CIBP                | ♀   | 0.406          | 0.818        |
| Pre        | CIBP-Sham <sub>BY</sub> / Sham <sub>BY</sub> -CIBP | ♀   | 0.86           | 0.941        |
| 3d         | Naive-Naive/Sham-Sham                              | ♀   | 0.398          | 0.868        |
| 3d         | Naive-Naive/CIBP-CIBP                              | ♀   | 0.222          | 0.793        |
| 3d         | Naive-Naive/CIBP-Sham <sub>BY</sub>                | ♀   | 0.815          | 0.955        |
| 3d         | Naive-Naive/Sham <sub>BY</sub> -CIBP               | ♀   | 0.691          | 0.921        |
| 3d         | Sham-Sham/CIBP-CIBP                                | ♀   | 0.102          | 0.704        |
| 3d         | Sham-Sham/ CIBP-Sham <sub>BY</sub>                 | ♀   | 0.508          | 0.86         |
| 3d         | Sham-Sham/ Sham <sub>BY</sub> -CIBP                | ♀   | 0.299          | 0.765        |
| 3d         | CIBP-CIBP/ CIBP-Sham <sub>BY</sub>                 | ♀   | 0.491          | 0.854        |
| 3d         | CIBP-CIBP/ Sham <sub>BY</sub> -CIBP                | ♀   | 0.405          | 0.818        |
| 3d         | CIBP-Sham <sub>BY</sub> / Sham <sub>BY</sub> -CIBP | ♀   | 0.963          | 0.985        |
| 8d         | Naive-Naive/Sham-Sham                              | ♀   | 0.35           | 0.851        |
| 8d         | Naive-Naive/CIBP-CIBP                              | ♀   | 0.197          | 0.639        |
| 8d         | Naive-Naive/CIBP-Sham <sub>BY</sub>                | ♀   | 0.536          | 0.719        |
| 8d         | Naive-Naive/Sham <sub>BY</sub> -CIBP               | ♀   | 0.209          | 0.538        |
| <b>8d</b>  | <b>Sham-Sham/CIBP-CIBP</b>                         | ♀   | <b>0.002**</b> | <b>0.379</b> |
| <b>8d</b>  | <b>Sham-Sham/ CIBP-Sham<sub>BY</sub></b>           | ♀   | <b>0.043*</b>  | <b>0.497</b> |
| <b>8d</b>  | <b>Sham-Sham/ Sham<sub>BY</sub>-CIBP</b>           | ♀   | <b>0.003**</b> | <b>0.28</b>  |
| 8d         | CIBP-CIBP/ CIBP-Sham <sub>BY</sub>                 | ♀   | 0.996          | 0.999        |
| 8d         | CIBP-CIBP/ Sham <sub>BY</sub> -CIBP                | ♀   | 0.435          | 0.831        |
| 8d         | CIBP-Sham <sub>BY</sub> / Sham <sub>BY</sub> -CIBP | ♀   | 0.46           | 0.733        |
| 17d        | Naive-Naive/Sham-Sham                              | ♀   | 0.554          | 0.913        |
| 17d        | Naive-Naive/CIBP-CIBP                              | ♀   | 0.532          | 0.908        |
| 17d        | Naive-Naive/CIBP-Sham <sub>BY</sub>                | ♀   | 0.114          | 0.618        |
| <b>17d</b> | <b>Naive-Naive/Sham<sub>BY</sub>-CIBP</b>          | ♀   | <b>0.033*</b>  | <b>0.469</b> |
| 17d        | Sham-Sham/CIBP-CIBP                                | ♀   | 0.234          | 0.804        |
| <b>17d</b> | <b>Sham-Sham/ CIBP-Sham<sub>BY</sub></b>           | ♀   | <b>0.043*</b>  | <b>0.496</b> |
| <b>17d</b> | <b>Sham-Sham/ Sham<sub>BY</sub>-CIBP</b>           | ♀   | <b>0.007**</b> | <b>0.333</b> |
| 17d        | CIBP-CIBP/ CIBP-Sham <sub>BY</sub>                 | ♀   | 0.329          | 0.781        |
| 17d        | CIBP-CIBP/ Sham <sub>BY</sub> -CIBP                | ♀   | 0.266          | 0.745        |
| 17d        | CIBP-Sham <sub>BY</sub> / Sham <sub>BY</sub> -CIBP | ♀   | 0.802          | 0.915        |
| Time       | Model                                              | ♀/♂ | Sig            | Wilks/Lambda |
| <b>Pre</b> | <b>Naive-Naive/Sham-Sham</b>                       | ♂   | <b>0.035*</b>  | <b>0.52</b>  |
| <b>Pre</b> | <b>Naive-Naive/CIBP-CIBP</b>                       | ♂   | <b>0.002**</b> | <b>0.382</b> |
| Pre        | Naive-Naive/CIBP-Sham <sub>BY</sub>                | ♂   | 0.261          | 0.742        |
| <b>Pre</b> | <b>Naive-Naive/Sham<sub>BY</sub>-CIBP</b>          | ♂   | <b>0.011*</b>  | <b>0.37</b>  |
| Pre        | Sham-Sham/CIBP-CIBP                                | ♂   | 0.980          | 0.997        |
| Pre        | Sham-Sham/ CIBP-Sham <sub>BY</sub>                 | ♂   | 0.113          | 0.616        |
| Pre        | Sham-Sham/ Sham <sub>BY</sub> -CIBP                | ♂   | 0.517          | 0.864        |

|            |                                                    |   |                    |              |
|------------|----------------------------------------------------|---|--------------------|--------------|
| <b>Pre</b> | <b>CIBP-CIBP/ CIBP-Sham<sub>BY</sub></b>           | ♂ | <b>0.012*</b>      | <b>0.376</b> |
| Pre        | CIBP-CIBP/ Sham <sub>BY</sub> -CIBP                | ♂ | 0.391              | 0.812        |
| Pre        | CIBP-Sham <sub>BY</sub> / Sham <sub>BY</sub> -CIBP | ♂ | 0.08               | 0.364        |
| <b>3d</b>  | <b>Naive-Naive/Sham-Sham</b>                       | ♂ | <b>&lt;.001***</b> | <b>0.34</b>  |
| <b>3d</b>  | <b>Naive-Naive/CIBP-CIBP</b>                       | ♂ | <b>&lt;.001***</b> | <b>0.299</b> |
| 3d         | Naive-Naive/CIBP-Sham <sub>BY</sub>                | ♂ | 0.218              | 0.713        |
| 3d         | Naive-Naive/Sham <sub>BY</sub> -CIBP               | ♂ | 0.096              | 0.685        |
| 3d         | Sham-Sham/CIBP-CIBP                                | ♂ | 0.126              | 0.726        |
| <b>3d</b>  | <b>Sham-Sham/ CIBP-Sham<sub>BY</sub></b>           | ♂ | <b>0.002**</b>     | <b>0.256</b> |
| <b>3d</b>  | <b>Sham-Sham/ Sham<sub>BY</sub>-CIBP</b>           | ♂ | <b>&lt;.001***</b> | <b>0.2</b>   |
| <b>3d</b>  | <b>CIBP-CIBP/ CIBP-Sham<sub>BY</sub></b>           | ♂ | <b>&lt;.001***</b> | <b>0.176</b> |
| <b>3d</b>  | <b>CIBP-CIBP/ Sham<sub>BY</sub>-CIBP</b>           | ♂ | <b>0.001***</b>    | <b>0.222</b> |
| 3d         | CIBP-Sham <sub>BY</sub> / Sham <sub>BY</sub> -CIBP | ♂ | 0.432              | 0.399        |
| 8d         | Naive-Naive/Sham-Sham                              | ♂ | 0.735              | 0.954        |
| <b>8d</b>  | <b>Naive-Naive/CIBP-CIBP</b>                       | ♂ | <b>0.001***</b>    | <b>0.365</b> |
| <b>8d</b>  | <b>Naive-Naive/CIBP-Sham<sub>BY</sub></b>          | ♂ | <b>0.015*</b>      | <b>0.393</b> |
| <b>8d</b>  | <b>Naive-Naive/Sham<sub>BY</sub>-CIBP</b>          | ♂ | <b>&lt;.001***</b> | <b>0.188</b> |
| <b>8d</b>  | <b>Sham-Sham/CIBP-CIBP</b>                         | ♂ | <b>&lt;.001***</b> | <b>0.34</b>  |
| <b>8d</b>  | <b>Sham-Sham/ CIBP-Sham<sub>BY</sub></b>           | ♂ | <b>0.011*</b>      | <b>0.368</b> |
| <b>8d</b>  | <b>Sham-Sham/ Sham<sub>BY</sub>-CIBP</b>           | ♂ | <b>&lt;.001***</b> | <b>0.138</b> |
| <b>8d</b>  | <b>CIBP-CIBP/ CIBP-Sham<sub>BY</sub></b>           | ♂ | <b>&lt;.001***</b> | <b>0.19</b>  |
| <b>8d</b>  | <b>CIBP-CIBP/ Sham<sub>BY</sub>-CIBP</b>           | ♂ | <b>&lt;.001***</b> | <b>0.068</b> |
| 8d         | CIBP-Sham <sub>BY</sub> / Sham <sub>BY</sub> -CIBP | ♂ | 0.072              | 0.35         |
| 17d        | Naive-Naive/Sham-Sham                              | ♂ | 0.528              | 0.906        |
| <b>17d</b> | <b>Naive-Naive/CIBP-CIBP</b>                       | ♂ | <b>&lt;.001***</b> | <b>0.343</b> |
| <b>17d</b> | <b>Naive-Naive/CIBP-Sham<sub>BY</sub></b>          | ♂ | <b>0.005**</b>     | <b>0.308</b> |
| <b>17d</b> | <b>Naive-Naive/Sham<sub>BY</sub>-CIBP</b>          | ♂ | <b>0.272</b>       | <b>0.272</b> |
| <b>17d</b> | <b>Sham-Sham/CIBP-CIBP</b>                         | ♂ | <b>0.319</b>       | <b>0.319</b> |
| <b>17d</b> | <b>Sham-Sham/ CIBP-Sham<sub>BY</sub></b>           | ♂ | <b>0.368</b>       | <b>0.368</b> |
| <b>17d</b> | <b>Sham-Sham/ Sham<sub>BY</sub>-CIBP</b>           | ♂ | <b>0.435</b>       | <b>0.435</b> |
| <b>17d</b> | <b>CIBP-CIBP/ CIBP-Sham<sub>BY</sub></b>           | ♂ | <b>0.154</b>       | <b>0.154</b> |
| <b>17d</b> | <b>CIBP-CIBP/ Sham<sub>BY</sub>-CIBP</b>           | ♂ | <b>0.178</b>       | <b>0.178</b> |
| 17d        | CIBP-Sham <sub>BY</sub> / Sham <sub>BY</sub> -CIBP | ♂ | 0.531              | 0.531        |

---

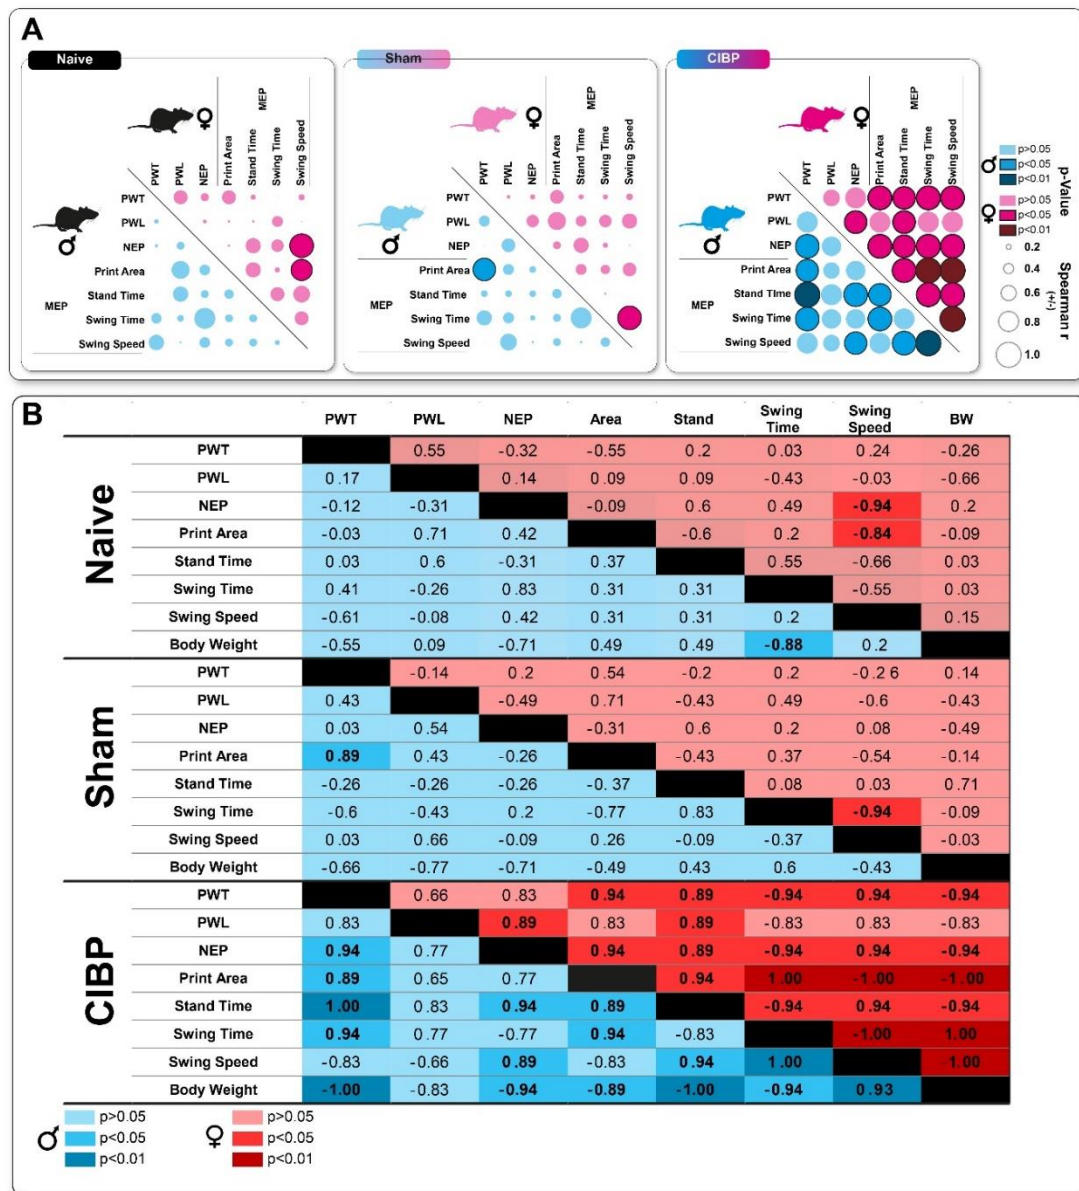

**Figure S1.** Correlation matrix between pain-related behavior features (A) The circle size represents the strength of the correlation; black cycle borders display significant correlation (Spearman r). (B) Representation of the raw Spearman correlations. Opaque colors represent significant correlations (<0.05).



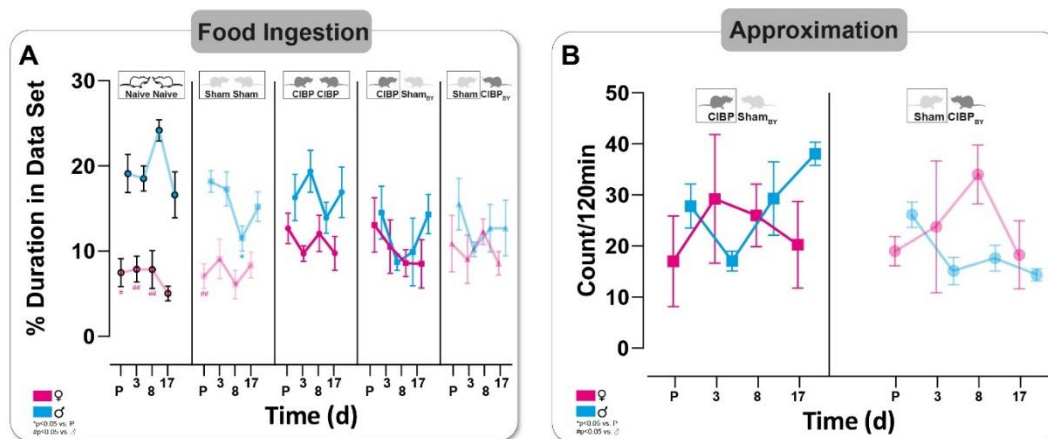

**Figure S3.** Bone cancer does not affect the rat's feed intake and approximation of both sexes. (A) Duration of feed intake in all four different housing conditions and (B) frequency of cage mate approximation in CIBP-ShamBY housing combination. Each housing combination was repeated four times with other animals (N=8, naive; N=8 sham; N=8 CIBP; N=4 CIBP-shamBY; N=4 shamBY-CIBP). Boxes represent the data shown. Results are expressed as mean± SEM. Two-way ANOVA (repeated measures based on GLM) followed by Dunnett's multiple comparison test \* for comparison to sham; P- Values: \* ≤ 0.05, \*\* ≤ 0.01, \*\*\* ≤ 0.001. † for comparison to male; P-values: † ≤ 0.05, †† ≤ 0.01, ††† ≤ 0.001.

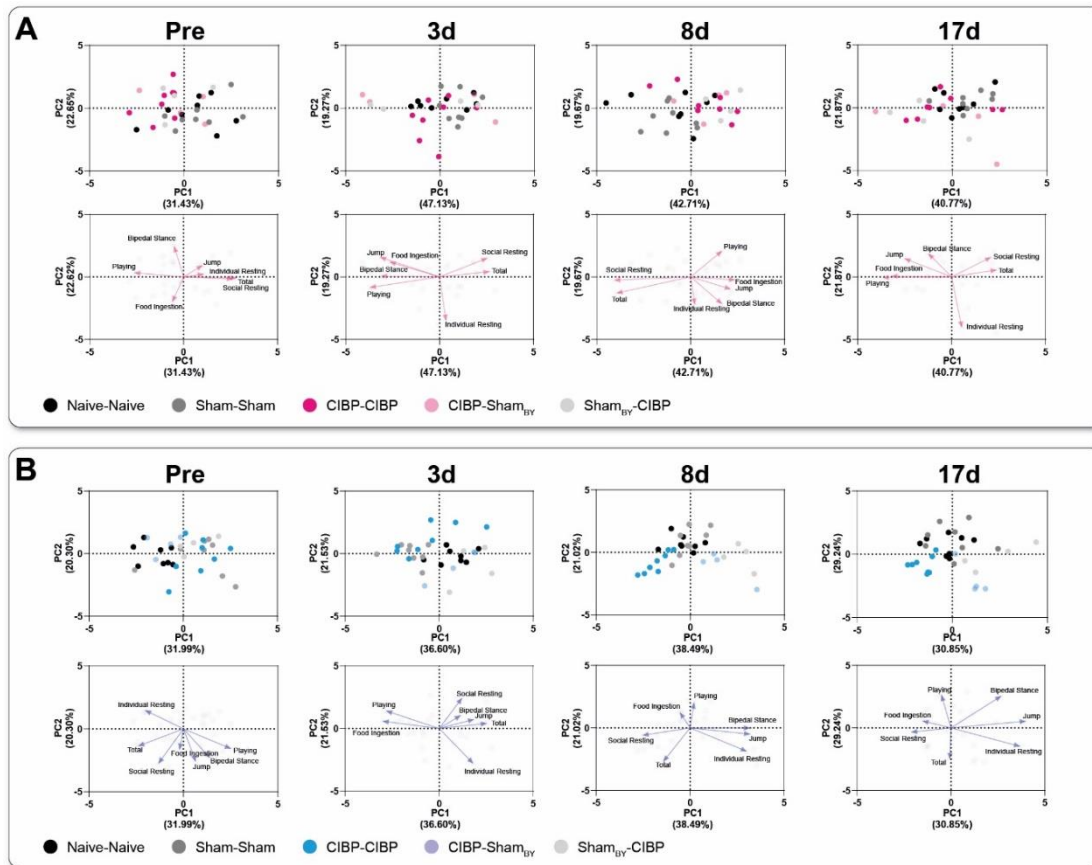

**Figure S4.** Bone cancer alters daily behavior in rats of both sexes. Principal component analysis (PCA) of multi-feature complex behavioral data was applied to identify a CIBP-induced phenotype in a time-dependent manner in (A) females and (B) males. The PC components were selected to determine the eigenvalues. MANOVA was used for cluster analysis in PCA (see supplementary Table 4).



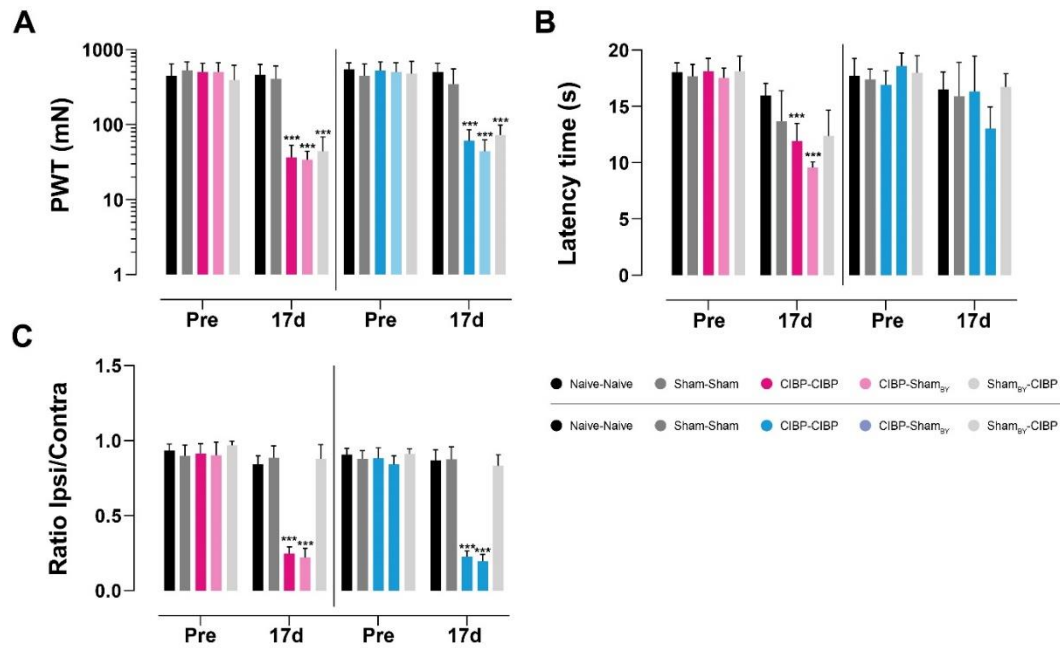

**Figure S5.** Social transfer of mechanical evoked pain-related behavior to sham bystander (BY) rats caused by cancer-induced bone pain in both sexes (A) Mechanical (PWT), heat (PWL) (B) thresholds, and (C) non-evoked pain-related behavior of the ipsilateral hind paws in rats of both sexes in four different housing conditions pre and 17d after cell inoculation. Four different housing combinations are shown here. Each housing combination was repeated four times with other animals (N=8, Naïve; N=8 sham; N=8 CIBP; N=4 CIBP-shamBY; N=4 shamBY-CIBP). Boxes represent the data shown. Results are expressed as mean± SEM. Two-way ANOVA (repeated measures based on GLM) followed by Dunnett's multiple comparison test \* for comparison to sham; P- Values: \* ≤ 0.05, \*\* ≤ 0.01, \*\*\* ≤ 0.001.
